# Supplementary material for: Phytic-Acid-Modified Copper Foil as a Current Collector for Lithium-Ion Batteries
Source: MDPI journal article supplement (doi:10.3390/met14020247), 2024-02-18
Supplement: s1 [file s1]

## Article

# Phytic-Acid-Modified Copper Foil as a Current Collector for Lithium-Ion Batteries

Mingtao Gan <sup>1,2</sup>, Mengjun Zhu <sup>1,2</sup>, Jiangping Tu <sup>1,2</sup>, Xiuli Wang <sup>1,2</sup>, and Changdong Gu <sup>1,2,\*</sup>

<sup>1</sup> School of Materials Science and Engineering, State Key Laboratory of Silicon Materials, Zhejiang University, Hangzhou 310027, China; 22160022@zju.edu.cn (M.G.); 22126069@zju.edu.cn (M.Z.); tujp@zju.edu.cn (J.T.); wangxl@zju.edu.cn (X.W.)

<sup>2</sup> Key Laboratory of Advanced Materials and Applications for Batteries of Zhejiang Province, Hangzhou 310027, China

\* Correspondence: cdgu@zju.edu.cn; Tel.: +86-13454164563

## Supplementary Materials

**Table S1.** Factors and groups of PA-based passivation solution.

| Groups | Factors   |                                        |                                                            |
|--------|-----------|----------------------------------------|------------------------------------------------------------|
|        | PA (mL/L) | Na <sub>2</sub> SiO <sub>3</sub> (g/L) | HO(CH <sub>2</sub> CH <sub>2</sub> O) <sub>n</sub> H (g/L) |
| 1      | 7.5       | 0.15                                   | 0.75                                                       |
| 2      | 10        | 0.3                                    | 1                                                          |
| 3      | 12.5      | 0.45                                   | 1.25                                                       |

**Table S2.** Electrodepositing process parameters.

| pH | Groups | Processing time (s) | Temperature (°C) | current density (A dm <sup>-2</sup> ) |
|----|--------|---------------------|------------------|---------------------------------------|
| 4  | 1      | 10                  | 25               | 1                                     |
| 7  | 2      | 20                  | 35               | 1                                     |
| 10 | 3      | 30                  | 45               | 1                                     |

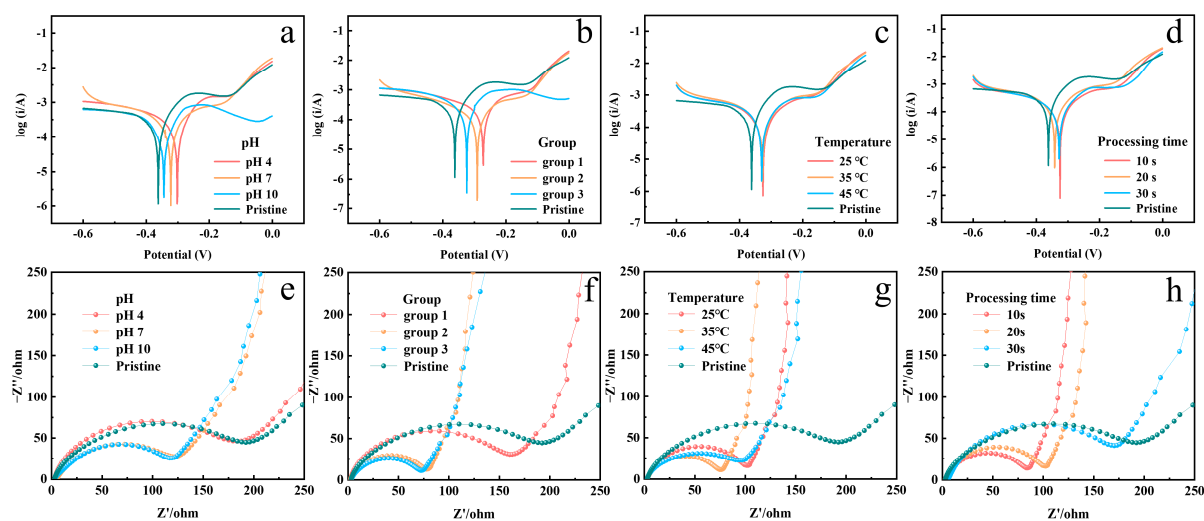

**Figure S1.** (a–d) Polarization curves of copper foil with different treatment parameters and the pristine Cu foil; (e–h) EIS curves of copper foil with different treatment parameters and the pristine copper foil.

**Table S3.** The  $i_{corr}$  and  $E_{corr}$  under different factors.

| Factors             |    | $i_{corr}$ ( $10^{-4}$ A $cm^{-2}$ ) | $E_{corr}$ (V) |
|---------------------|----|--------------------------------------|----------------|
| pH                  | 4  | 2.241                                | −0.302         |
|                     | 7  | 2.185                                | −0.322         |
|                     | 10 | 2.567                                | −0.344         |
| Groups              | 1  | 2.657                                | −0.272         |
|                     | 2  | 1.474                                | −0.291         |
|                     | 3  | 2.780                                | −0.324         |
| Temperature (°C)    | 25 | 1.484                                | −0.326         |
|                     | 35 | 1.661                                | −0.328         |
|                     | 45 | 2.202                                | −0.330         |
| Processing time (s) | 10 | 0.948                                | −0.325         |
|                     | 20 | 1.380                                | −0.342         |
|                     | 30 | 1.096                                | −0.328         |
| /                   | /  | 3.129                                | −0.362         |

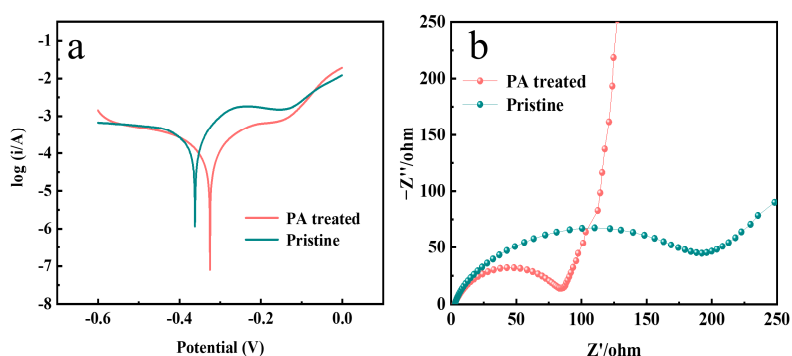

**Figure S2.** (a) Polarization curves (b) EIS curves of pristine Cu foil and PA-Cu foil.

**Table S4.** The  $i_{corr}$  and  $E_{corr}$  of the Cu foils with and without PA treatment.

|                                      | PA-Cu foil | Pristine Cu foil |
|--------------------------------------|------------|------------------|
| $i_{corr}$ ( $10^{-4}$ A $cm^{-2}$ ) | 0.948      | 3.129            |
| $E_{corr}$ (V)                       | −0.325     | −0.362           |

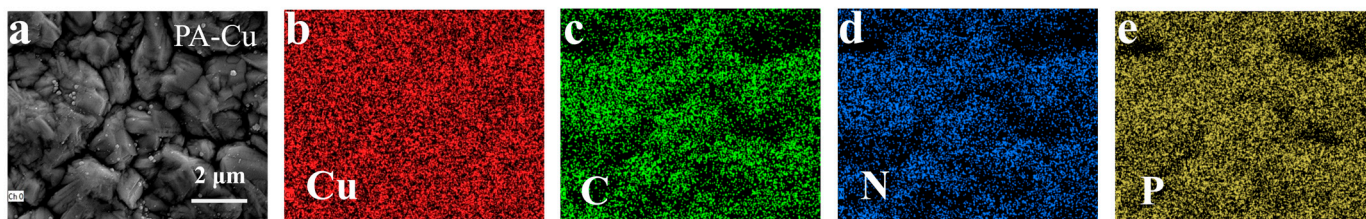

Figure S3. EDS energy spectra of PA-Cu.

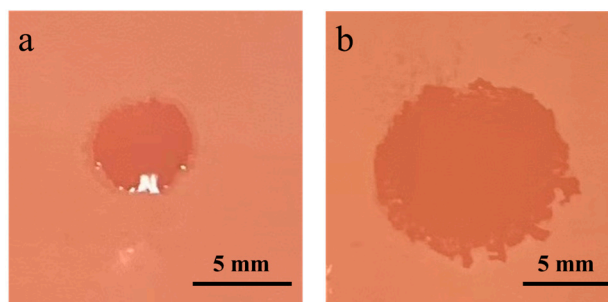

Figure S4. (a) PA-Cu foil surface and (b) pristine Cu foil surface with 1  $\mu\text{L}$  electrolyte drop after 10 s.

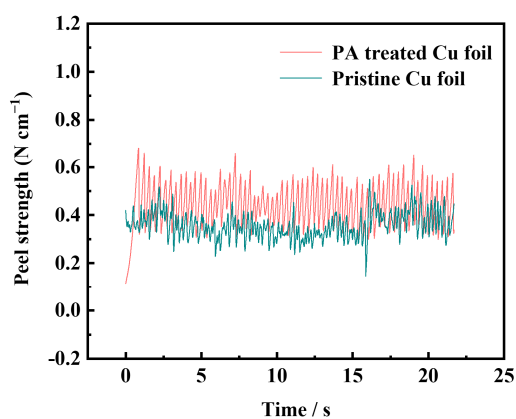

Figure S5. Peel strength of two types of copper foil.

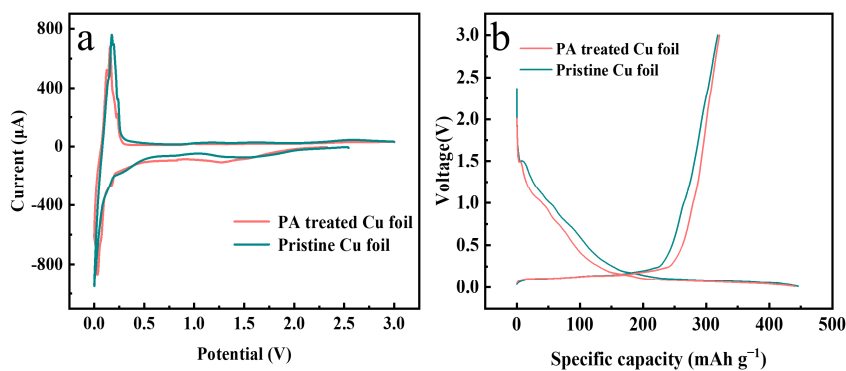

Figure S6. (a) Initial CV curves and (b) initial charge–discharge curves at 0.1  $\text{A g}^{-1}$  of the graphite/Cu and graphite/PA-Cu electrodes.

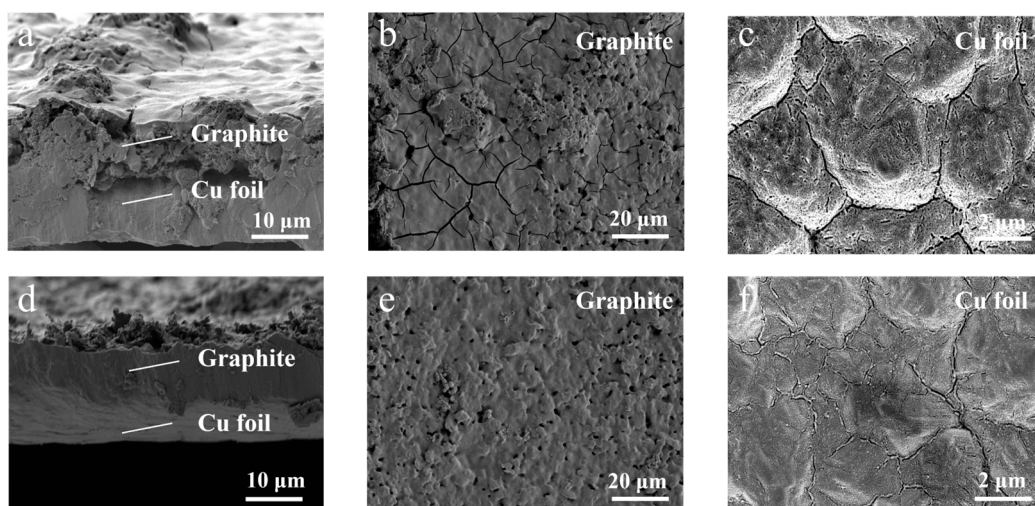

**Figure S7.** SEM images of (a) the cross-section of the graphite/Cu electrode, (b) the surface of the graphite/Cu electrode, and (c) the pristine Cu foil without the active substance after 200 cycles at 1 A g<sup>-1</sup>; SEM images of (d) the cross-section of the graphite/PA-Cu electrode, (e) the surface of the graphite/PA-Cu electrode, and (f) the PA-Cu foil without the active substance after 200 cycles at 1 A g<sup>-1</sup>.
